# Supplementary material for: Erosion of natural darkness in the geographic ranges of cacti
Source: PubMed Central journal article supplement (PMC5847551; doi:10.1038/s41598-018-22725-8), 2018-03-12
Supplement: 41598_2018_22725_MOESM1_ESM.pdf [file 41598_2018_22725_MOESM1_ESM.pdf]

## Erosion of natural darkness in the geographic ranges of cacti

Maria Eugenia Correa-Cano<sup>1\*</sup>, Bárbara Goettsch<sup>2</sup>, James P. Duffy<sup>1</sup>, Jonathan

Bennie<sup>1</sup>, Richard Inger<sup>1</sup> and Kevin J. Gaston<sup>1</sup>

<sup>1</sup>Environment and Sustainability Institute, University of Exeter, Penryn, Cornwall  
TR10 9FE, UK

<sup>2</sup>International Union for Conservation of Nature, Global Species Programme, The  
David Attenborough Building, Pembroke Street, Cambridge CB2 3QZ, UK

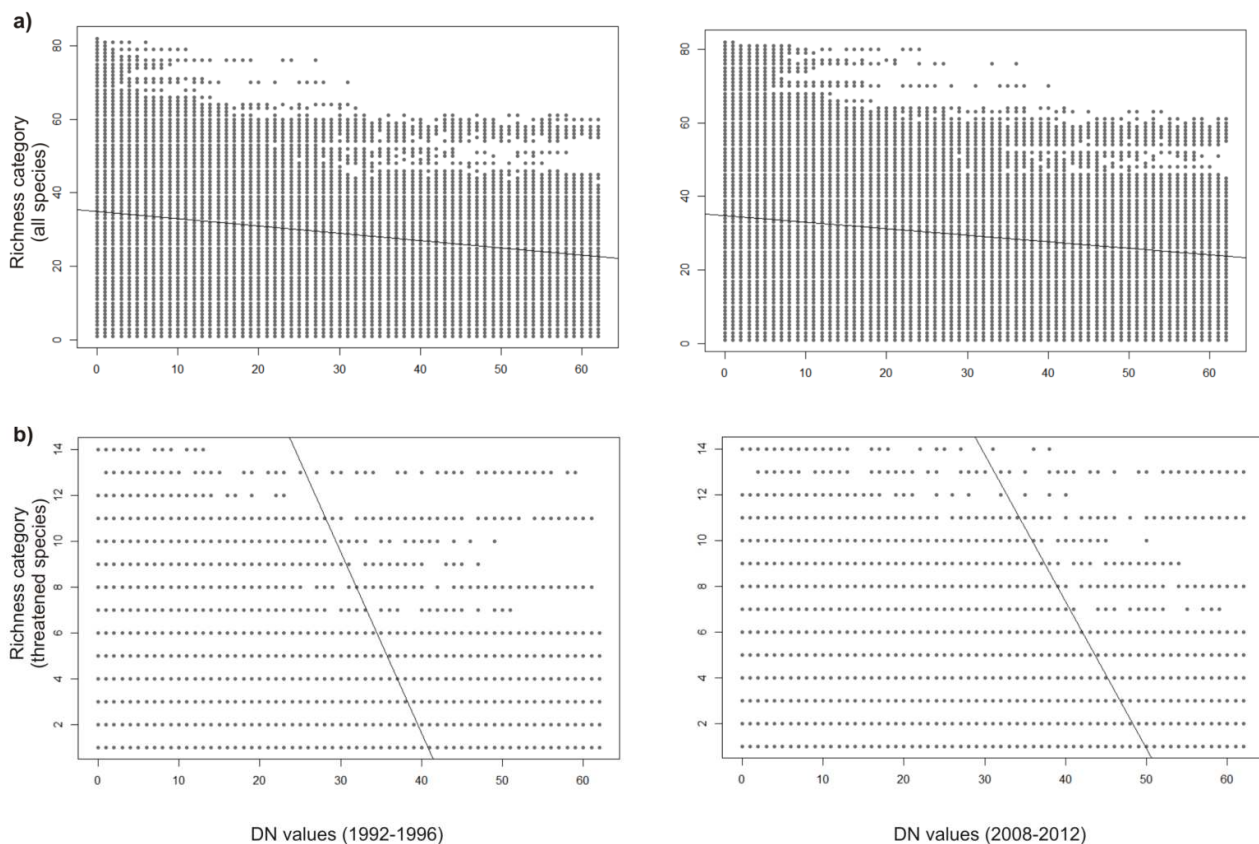

### Supplementary Figure S1 Artificial lighting and species richness. (a)

Relationships between species richness categories and its average DN values for the periods 1992-1996 and 2008-2012 and (b) relationships between threatened species richness categories and its average DN values for the same periods of time.
